# 1 **Brain rhythms shift and deploy attention**

2 **Craig G. Richter**<sup>a,b,1</sup>, **Conrado A. Bosman**<sup>c,d</sup>, **Julien Vezoli**<sup>a</sup>, **Jan-Mathijs Schoffelen**<sup>c</sup> &  
3 **Pascal Fries**<sup>a,c,1</sup>

4 <sup>a</sup>Ernst Strüngmann Institute (ESI) for Neuroscience in Cooperation with Max Planck Society,  
5 Deutschordenstraße 46, 60528 Frankfurt, Germany, <sup>b</sup>BCBL. Basque Center on Cognition, Brain and  
6 Language, Mikeletegi Pasealekua 69, 20009 Donostia, Spain, <sup>c</sup>Donders Institute for Brain, Cognition  
7 and Behaviour, Kapittelweg 29, Radboud University, 6525 EN Nijmegen, Netherlands, and  
8 <sup>d</sup>Swammerdam Institute for Life Sciences, Center for Neuroscience, Faculty of Science, University of  
9 Amsterdam, Sciencepark 904, 1098 XH Amsterdam, Netherlands.

10 <sup>1</sup>Correspondence should be addressed to Dr. Craig Richter or Dr. Pascal Fries, Ernst Strüngmann  
11 Institute (ESI) for Neuroscience in Cooperation with Max Planck Society, Deutschordenstraße 46,  
12 60528 Frankfurt, Germany. E-Mails: [craig.richter@esi-frankfurt.de](mailto:craig.richter@esi-frankfurt.de), [pascal.fries@esi-frankfurt.de](mailto:pascal.fries@esi-frankfurt.de)

13 **Keywords:** brain rhythms, theta, beta, gamma, attention, visual, cortex, electrocorticography

14

15 **Major Classification:** Biological Sciences

16 **Minor Classification:** Neuroscience

## 17 **Abstract**

18 One of the most central cognitive functions is attention. Its neuronal underpinnings have primarily been  
19 studied during conditions of sustained attention. Much less is known about the neuronal dynamics  
20 underlying the processes of shifting attention in space, as compared to maintaining it on one stimulus,  
21 and of deploying it to a particular stimulus. Here, we use ECoG to investigate four rhythms across large  
22 parts of the left hemisphere of two macaque monkeys during a task that allows investigation of  
23 deployment and shifting. Shifting involved a strong transient enhancement of power in a 2-7 Hz theta  
24 band in frontal, pre-motor and visual areas, and reductions of power in an 11-20 Hz beta band in a  
25 fronto-centro-parietal network and in a 29-36 Hz high-beta band in premotor cortex. Deployment of  
26 attention to the contralateral hemifield involved an enhancement of beta power in parietal areas, a  
27 concomitant reduction of high-beta power in pre-motor areas and an enhancement of power in a  
28 60-76 Hz gamma band in extra-striate cortex. Effects due to shifting occurred earlier than effects due to  
29 deployment. These results demonstrate that the four investigated rhythms are involved in attentional  
30 allocation, with striking differences between shifting and deployment between different brain areas.

## 31 **Significance**

32 We are often confronted by many visual stimuli, and attentional mechanisms select one stimulus for in-  
33 depth processing. This involves that attention is shifted between stimuli and deployed to one stimulus  
34 at a time. Prior studies have revealed that these processes are subserved by several brain rhythms.  
35 Therefore, we recorded brain activity in macaque monkeys with many electrodes distributed over large  
36 parts of their left hemisphere, while they performed a task that involved shifting and deploying attention.  
37 We found four dominant rhythms: theta (2-7 Hz), beta (11-20 Hz), high-beta (29-36 Hz) and gamma  
38 (60-76 Hz). Attentional shifting and deployment involved dynamic modulations in the strength of those  
39 rhythms with high specificity in space and time.

## 40 **Introduction**

41 Selective attention is a central cognitive process that has been extensively studied both behaviorally  
42 and using invasive and non-invasive neurophysiological techniques. Despite widespread investigation,  
43 the mechanisms that control the shifting and deployment of attention are not yet fully understood. This  
44 is in part due to the fact that most respective studies compare attention conditions with no regard to  
45 temporal change, assuming static attention to different stimuli. Such approaches are blind to the  
46 temporally dynamic processes that construct an attentional state. Here, we investigate those dynamic  
47 processes, distinguishing between attentional shifting and attentional deployment. We define attentional  
48 shifting as the process that shifts attention in general, irrespective of the target stimulus or the shift  
49 direction; we define attentional deployment as the process that allocates attention to one out of two  
50 simultaneously present but spatially separate stimuli. There are a few studies that have investigated  
51 these questions non-invasively in humans. Among them, one study combined fMRI with an intricate task

52 design to dissociate between brain activity underlying attentional deployment to a particular hemifield  
53 from activity underlying attentional shifts in general (1). The combination of event related fMRI and EEG  
54 with a specially designed attentional cueing paradigm allowed another study to track event-related  
55 potentials (ERPs) specifically related to attentional control or attentional orienting (2). Another study  
56 used steady-state evoked potentials to track attentional allocation in time and directly link the time  
57 courses of cortical facilitation to the behavioral benefits of attention (3). The current investigation seeks  
58 to build on these previous works by using high-resolution micro-electrocorticography (ECoG) in  
59 macaque monkeys to track the processes underlying attentional shifting and attentional deployment in  
60 space, time and frequency. The ECoG grid employed in this study provides an excellent means of  
61 tracking attentional dynamics, because it provides high spatial and temporal resolution while covering a  
62 large portion of sensory and executive cortical areas.

63 The need for high temporal resolution is underscored by recent studies showing that attention is  
64 subserved by brain rhythms for the control and implementation of attentional selection. Numerous  
65 studies have established that neurons across the hierarchy of visual areas show enhanced local and  
66 interareal gamma- and/or beta-band synchronization (4-17), and reduced theta-band synchronization  
67 and theta-gamma coupling (18), when processing attended as compared to un-attended stimuli. Yet,  
68 none of these studies has isolated the time-courses of attention-related effects from the time-course of  
69 sensory cue processing, or distinguished the time-course of general attentional shifting from the time-  
70 course of spatially specific attentional deployment. We hypothesize that attentional shifting and  
71 deployment are subserved by spatially, spectrally and temporally specific neuronal engagement. The  
72 current study employs a subtractive paradigm to isolate neurophysiological correlates of deployment  
73 and shifting of attention while minimizing cue-evoked confounds. Our results show a remarkable  
74 diversity of function across four distinct narrow-band rhythms in the theta, beta, high-beta and gamma  
75 bands. This activity shows distinct temporal dynamics across frequencies that arise in specific cortical  
76 locations.

## 77 **Results**

78 **Two contrasts, isolating attentional deployment and attentional shifting.** Two macaque monkeys  
79 performed a task entailing spatially selective visual attention (17), which is illustrated and described in  
80 detail in Figure 1A. Electrographic (ECoG) grid recordings were obtained from a large portion of  
81 the left hemisphere (Fig. 1B). Two stimuli were presented in the two visual hemifields, and at a later  
82 time, one of them was cued to be the behaviorally relevant target, leaving the other one to be the  
83 distracter. Monkeys were required to report with a bar release randomly timed changes in the target.  
84 The task paradigm allowed for changes in either stimulus also prior to cue onset, and in this case,  
85 responses were rewarded in a random 50% of the trials.

86 Unexpectedly, the monkeys showed a spontaneous bias towards responding to blue stimuli prior to cue  
87 onset (Fig. 2A;  $\chi^2(1, N=793) = 88.59, p = 0$ ). This bias disappeared after cue presentation, when the

88 monkeys showed a balanced response profile to blue and yellow target stimuli (Fig. 2B;  $\chi^2(1, N=2296)$   
89 = 2.31,  $p = 0.13$ ). This bias was also reflected in the reaction times of the monkeys, where responses  
90 to yellow targets were significantly longer than those to blue targets up to 150 ms after cue onset (Fig.  
91 2C). Taken together, the greater likelihood of reporting pre-cue changes in blue rather than yellow  
92 stimuli, and the longer reaction times to post-cue changes in yellow targets indicate the presence of a  
93 spontaneous attentional bias toward the blue stimulus prior to cue onset.

94 Figure 2D illustrates the inferred attentional location as a function of time around cue onset. This depicts  
95 the attentional bias to the blue stimulus until cue onset, at which point a blue cue indicates that the  
96 monkey must maintain attention to the blue stimulus, whereas a yellow cue indicates that attention  
97 should be shifted to the yellow stimulus. We took advantage of this unexpected, spontaneous bias and  
98 constructed two contrasts for the analysis of the ECoG recordings, as illustrated in Figure 2E. One  
99 contrast is referred to as the **attention contrast**, because it isolates the effects of deploying selective  
100 attention to the contralateral versus the ipsilateral hemifield. Effects of attentional shifting as such are  
101 contained in the individual component conditions but are removed by the subtraction. The other contrast  
102 is referred to as the **shift contrast**, because it contrasts the shifting of attention in either direction with  
103 maintaining attention in either hemifield, and thereby isolates the effects of attentional shifting. Effects  
104 of the deployment or maintenance of attention to a particular hemifield are contained in the individual  
105 component conditions, but are removed by the subtraction.

106 Note that the **attention contrast** is completely balanced with regard to stimulus and fixation point  
107 coloring. That is, each stimulus is colored both blue and yellow on each side of the subtraction. Similarly,  
108 the fixation point is colored both blue and yellow on each side. This ensures that any differences in the  
109 neuronal representation of stimulus or fixation point color are not mistaken as attention effects.

110 Note that the **shift contrast** is not completely balanced. Balancing is achieved for stimulus coloring, but  
111 not for fixation point coloring. We acknowledge this fact here, while in the discussion section, we explore  
112 the likelihood of this imbalance to explain the results obtained with the **shift contrast**.

113 **Oscillatory activity is most prominent in four frequency bands.** Oscillatory activity can be detected  
114 with particularly high sensitivity by metrics of phase coupling (19, 20). Therefore, the pairwise phase  
115 consistency (PPC) (21) was computed between all possible pairs of recording sites, and the peaks in  
116 each PPC spectrum were identified via an automated fitting algorithm (Fig. 3B,D). This showed that in  
117 both monkeys, the probability of finding a peak was highest within four distinct frequency bands  
118 (Fig. 3A,C). These bands corresponded to the previously described theta, beta, high-beta and gamma  
119 rhythms. Each band was characterized by its peak frequency and the full-width-at-half-maximum (see  
120 Fig. 3A,C), which defined four frequency bands of interest (FOIs). Analyses focused on local field  
121 potential (LFP) power, averaged within those FOIs and over monkeys. We investigated the temporal  
122 dynamics for the **attention contrast** and the **shift contrast**, separately for the four FOIs and the 14  
123 brain areas illustrated in Figure 1B.

124 **Attention contrast and shift contrast in time and space: theta.** Figure 4B shows the dynamics of  
125 theta power in the 14 areas, separately for attentional deployment to the stimulus contralateral (red) and  
126 ipsilateral (green) to the recorded hemisphere. The respective statistical testing entailed correction for  
127 the multiple comparisons across FOIs, areas and the investigated time points. This contrast did not  
128 reveal significant differences. Note that a previous study established an attentional reduction in theta  
129 activity within V1 and V4, theta synchronization between V1 and V4 and theta-gamma coupling in  
130 V1(18). This study primarily used data from later periods relative to cue onset. Consistent with that, our  
131 present analyses show the same trend for an attentional reduction in theta power in V1, V2, V4 and  
132 TEO, towards the end of the present analysis window. Figure 4A illustrates the respective topographical  
133 distributions. Here and in the following, these topographical plots are provided for illustration of the full  
134 spatial distribution of power contrasts without statistical testing, whereas statistical testing is provided  
135 for the time-courses of the separate areas.

136 Figure 4C shows the corresponding analyses for the shifting (yellow) versus maintaining (blue) of  
137 attention. **Shifting** induced a transient enhancement of theta power peaking between 200 and 400 ms  
138 after cue onset, in the pre-frontal and pre-motor areas. A very similar enhancement was significant in  
139 TEO and trending across visual areas, even though these areas are distant to the frontal areas with  
140 regard to their spatial position and distinct with regard to their beta dynamics (see below). This transient  
141 theta power enhancement did not reach significance in sensorimotor areas F1 and S1 and in area DP,  
142 even though these areas are partly neighboring the frontal areas and exhibiting similar beta dynamics  
143 (see below). When attention was maintained, theta power dynamics lacked any notable transient  
144 change. Figure 4D illustrates the respective topographies.

145 **Attention contrast and shift contrast in time and space: beta.** Figure 5B shows the dynamics of  
146 beta-band power for the **attention contrast**. Attentional deployment to the contralateral stimulus  
147 induced an enhancement of beta-band power in posterior parietal areas DP and 7A-OPT, reaching  
148 significance at approximately 650 ms, and persisting to the end of the analysis window at 1 s. Frontal  
149 and pre-motor areas F2, F4 and area 8 showed a similar trend. Figure 5A shows the respective  
150 topographies.

151 Figure 5C shows the beta-band dynamics for the **shift contrast**. Attentional shifting is associated with  
152 a transient pronounced decrease in beta frequency power, peaking at approximately 400 ms post-cue,  
153 which is highly consistent across frontal, pre-motor, sensorimotor and posterior parietal areas. When  
154 attention was maintained, beta power dynamics lacked any notable transient change, similar to the  
155 above described theta-band power dynamics. Yet note that the signs of the transient, short-latency  
156 shifting effects were opposite, with beta power decreases and theta power increases. Figure 5D shows  
157 the corresponding topographies for the **shift** dynamics.

158 **Attention contrast and shift contrast in time and space: high-beta.** Figure 6B shows the dynamics  
159 of high-beta-band power for the **attention contrast**. Attentional deployment to the ipsilateral stimulus,  
160 i.e. an attentional disengagement of the recorded hemisphere, induced an increase in high-beta power

161 in areas F2, F4 and TEO. Note that while pre-motor areas showed a clear high-beta peak in their power  
162 spectra, this was not the case for TEO. Note also that attention increased high-beta power in some  
163 areas (Fig. 6B) while decreasing beta power in others (Fig. 5B). The topographies for the high-beta  
164 **attention contrast** are shown in Figure 6A.

165 Figure 6C shows the high-beta power dynamics associated with the **shift contrast**. Attentional shifting  
166 induced a transient decrease in high-beta power in area F2, peaking at  $\approx 250$  ms. Similar trends are  
167 present in areas F4, area 8, F1 and S1. This effect is similar to that seen for beta power in neighboring  
168 areas (Fig. 5C), though the high-beta power decrease is maximal approximately 150 ms earlier and is  
169 spatially more constrained. Figure 6D illustrates the topographical evolution of the dynamics for the **shift**  
170 **contrast**.

171 **Attention contrast and shift contrast in time and space: gamma.** Figure 7B depicts the time course  
172 of gamma power differences for the **attention contrast**. Attentional deployment to the contralateral  
173 stimulus induced enhanced gamma power in extrastriate areas. Latencies of this enhancement were  
174 shorter for areas higher up in the visual hierarchy, i.e. there was a backward progression of attentional  
175 effects as shown before for firing rates (22): After cue presentation, enhancements reached significance  
176 at 450 ms in TEO, 500 ms in V4 and 600 ms in V2. Unlike in the beta and high-beta bands, attentional  
177 effects in the gamma band were confined to extrastriate cortex and were not detectable in more anterior  
178 areas. The associated power change topographies are shown in figure 7A.

179 Figure 7C shows the **shift contrast** for gamma power and reveals no significant differences. The  
180 associated power difference topographies are shown in figure 7D.

181 **Shift effects occurred earlier than deployment effects.** A closer inspection of the time-courses of  
182 effects suggested that overall, the differences due to attentional shifts occurred earlier than the  
183 differences due to attentional deployment. To test this, we compiled a metric of overall differences  
184 separately for the shift and the deployment contrast: We rectified the condition differences, averaged  
185 them over areas and frequency bands and tested whether this value was significantly larger than zero  
186 (non-parametric randomization of conditions across trials, corrected for the multiple comparisons over  
187 time points). Figure 8 shows the resulting time courses and confirms that the overall shift effect starts  
188 earlier than the overall deployment effect. The shift effect reaches significance at the time of the cue  
189 presentation. This is possible, because each indicated time point corresponds to an analysis window of  
190  $\pm 250$  ms length. Furthermore, the shift effect shows a peak around 300 ms after the cue. The  
191 deployment effect reaches significance at 200 ms after cue presentation, and it steadily increases with  
192 time after the cue.

## 193 **Discussion**

194 In summary, we used large-scale high-density ECoG in two macaque monkeys and analyzed the  
195 signals, differentiating them in space, time and frequency, to test for effects of attentional deployment

196 or shifting. This revealed four rhythms that showed effects with clear spatial, temporal and spectral  
197 specificity.

198 The spatial specificity was reflected in the fact that different frequency bands showed very different  
199 effects in different brain areas: Theta effects, which were exclusively significant for shift contrasts,  
200 occurred in areas 8, F4, F2 and TEO, while sparing high-level areas in parietal cortex, like areas 7A-  
201 OPT, 7A-PG and 7B; high-beta power effects were primarily localized to F2 and F4; gamma effects  
202 were restricted to extrastriate visual areas TEO, V4 and V2.

203 The temporal specificity was apparent in the fact that shift effects occurred earlier than deployment  
204 effects. Among shift effects, both theta and high-beta effects tended to occur earlier than beta effects.

205 The spectral specificity was evident in the fact that beta and high-beta showed shift effects in the same  
206 direction, yet deployment effects in the opposite direction. Also, there were opposite shift effects for  
207 theta versus beta and high-beta. While theta showed a shift-related enhancement, beta and high-beta  
208 showed a shift-related decrease. This latter observation supports the notion that beta is involved in the  
209 maintenance of the status-quo (23) and is therefore reduced when attention shifts; it might also support  
210 the notion that theta is involved in shifting in the sense of an attentional reset (24, 25).

211 Essentially the only case, in which two rhythms showed a similar effect is the shift-related reduction in  
212 beta in area F4 and of high-beta in area F2; yet even there, the effects began earlier in high-beta than  
213 beta; furthermore, for the deployment contrast, the same rhythms in the same areas showed opposite  
214 effects or trends. Thus, our observation that the effects differ at least along space or time, or between  
215 the shift and deployment contrast, strongly suggests that the different rhythms are regulated by  
216 independent mechanisms. Note that studies relying solely on conventional metrics of neuronal  
217 activation, like neuronal firing rates or BOLD, would not be able to see the differential and sometimes  
218 opposing effects on different rhythms, and the concomitant spatial and temporal specificity of those  
219 effects. This demonstrates the usefulness of large-scale high-density ECoG recordings, allowing  
220 analyses that are resolved simultaneously along the spatial, temporal and spectral dimension.

221 A point of potential concern relates to the imbalance of the cue properties for the shift contrast. Unlike  
222 the attention contrast, which is fully balanced in stimulus and cue properties, the shift contrast has  
223 unbalanced cue colors, such that attentional shifting occurs in response to the yellow fixation point, while  
224 the maintenance of attention is triggered by the blue fixation point (Fig. 2E). We argue that this  
225 imbalance is unlikely to explain the majority of the observed effects. The physical difference between a  
226 yellow versus a blue fixation point is expected to cause local effects in neurons that are selective for the  
227 representation of the fovea and that are color selective. Neurons selective for different colors are partly  
228 intermingled within cortical areas (26, 27), such that our recordings with 1 mm diameter ECoG  
229 electrodes might well average over different color domains and thereby reduce or even eliminate color-  
230 differential responses. Potential residual color-differential responses in individual recording sites should  
231 be further reduced by our averaging over all recording sites in a given area. In contrast to those

232 expectations for color-differential responses, the cognitive difference between a yellow versus a blue  
233 fixation point, i.e. the attentional shift, is expected to cause widespread effects, including pre-frontal and  
234 pre-motor areas. Our results are consistent with this expectation, because we find near-simultaneous  
235 effects in those areas and visual areas. The behavioral data suggest that both animals, in the period  
236 before cue onset, spontaneously chose to attend the blue stimulus, probably because it was more salient  
237 and/or it allowed an easier detection of the to-be-reported shape change. If the same preference for  
238 blue would have led to stronger responses to the fixation point turning blue, then this should have  
239 induced stronger spectral perturbations in response to blue cue onsets. By contrast, we find that spectral  
240 perturbations were stronger for yellow cue onsets. This is particularly prominent in the theta and beta  
241 bands, where blue cues hardly or not at all perturbed the dynamics, whereas yellow cues led to very  
242 clear transient perturbations lasting for 0.2-0.4 s. This pattern suggests that the effects of the two cue  
243 colors are to be interpreted in the shift-versus-maintain sense, because maintaining attention (blue) is  
244 expected to involve less cognitive effort than shifting it (yellow). Only for gamma in striate and  
245 extrastriate areas did we find a trend towards enhancement with the blue cue, as expected for an effect  
246 of higher salience, yet this did not reach significance.

247 Several previous investigations have explored some aspects related to the present study. The time  
248 course of attentional shifts has been investigated with steady-state visual evoked potentials (SSVEPs)  
249 obtained with EEG recordings from human subjects performing an attention task similar to our task (3).  
250 In response to cue presentation, SSVEPs showed neuronal signs of attentional shifting with close  
251 temporal relationship to the attentional effect on behavior. The spatial pattern of brain regions involved  
252 in attentional deployment and shifting has been investigated with fMRI in human subjects (1). BOLD  
253 signals in extrastriate cortex reflected attentional deployment for the duration of sustained attention. By  
254 contrast, BOLD signals in posterior parietal cortex were transiently enhanced during attentional shifts.  
255 The BOLD signal is correlated to different measures of neuronal activation, and is particularly strongly  
256 related to gamma-band activity (28-31). In agreement with this and the fMRI study, we found gamma to  
257 be enhanced for the attention contrast in extrastriate cortex, starting around 0.4 s after cue onset and  
258 lasting until the end of the analysis period. Note that our analysis of beta and high-beta revealed  
259 additional effects of sustained attentional deployment outside of visual cortex, in areas DP and 7A-OPT  
260 for beta, and in areas F2 and F4 for high-beta. Note also that our analysis did not reveal a shift-related  
261 transient increase in posterior parietal gamma, as might have been expected on the basis of the fMRI  
262 results and other studies showing attention-related parietal gamma modulation (32). Our ECoG might  
263 not have covered the involved parts of parietal cortex, which might be located inside the intra-parietal  
264 sulcus, and/or it might have had too low spatial resolution to reveal very local gamma enhancements.  
265 Another study used fMRI to aid the analysis of event-related potentials (ERPs) during cue-related  
266 attentional deployment (2). This revealed an activation sequence starting in medial frontal cortex,  
267 progressing through medial parietal cortex and finally affecting visual occipital cortex. The relations  
268 between ERPs and long-lasting perturbations of different rhythms are not well understood. An analysis  
269 of ERPs in the current ECoG dataset will allow a more direct comparison with the human ERP data and



270 is a highly relevant task for the future. A similar sequence of frontal-then-visual engagement as  
271 described with the ERPs has also been found with combined microelectrode recordings from the frontal  
272 eye field (FEF) and V4 in macaques (6). Attention enhances gamma Granger causality from FEF to V4  
273 as soon as 110 ms after cue presentation, whereas it enhances gamma Granger causality from V4 to  
274 FEF only from 160 ms onwards. Also, studies investigating attention effects on firing rates have found  
275 similar sequences. Firing rate enhancements in response to attentional targets occur first in prefrontal  
276 and subsequently in parietal cortex (15). Similarly, firing rate enhancements in response to attended  
277 versus non-attended stimuli occur earlier in V4, at intermediate latencies in V2 and at the longest  
278 latencies in V1 (22).

279 Future work will need to investigate putative cross-frequency interactions between the rhythms  
280 described here (18). For example: Does the timing and strength of the shift-related pre-frontal and pre-  
281 motor theta enhancement on a given trial predict the timing and strength of the shift-related high-beta  
282 and beta decreases in those regions and/or the beta decreases in parietal areas? How are high-beta  
283 and beta related, given that they show partly similar and partly opposite dynamics, and that they occupy  
284 partly the same territory (pre-frontal and pre-motor), yet partly different territory (parietal shows beta  
285 effects, but no high-beta effects). The present and those future investigations have been made possible  
286 through the simultaneously high spatial and temporal resolution of the high-density large-scale ECoG  
287 approach. Yet, as mentioned above, further improvements in density will likely reveal further detail e.g.  
288 in parietal and pre-frontal cortex. As an isotropic increase in density will lead to a cubic increase in  
289 channel count, future approaches will likely have to find a compromise between coverage and density,  
290 and combine widespread low-density with targeted high-density recordings.

## 291 **Methods**

292 **Paradigm, stimulation and subjects.** Data from two adult male macaque monkeys (*macaca mulatta*)  
293 were collected for this study. All experimental procedures were approved by the ethics committee of the  
294 Radboud University Nijmegen (Nijmegen, The Netherlands). Stimuli were presented on a CRT monitor  
295 (120 Hz non-interlaced) in a dimly lit booth and controlled by CORTEX software  
296 ([https://www.nimh.nih.gov/labs-at-nimh/research-areas/clinics-and-labs/ln/shn/software-](https://www.nimh.nih.gov/labs-at-nimh/research-areas/clinics-and-labs/ln/shn/software-projects.shtml)  
297 [projects.shtml](https://www.nimh.nih.gov/labs-at-nimh/research-areas/clinics-and-labs/ln/shn/software-projects.shtml)). The paradigm with all details is illustrated in Figure 1A and its legend.

298 **Electrophysiological recording and preprocessing.** LFP recordings were made via a 252 channel  
299 electrocorticographic grid (ECoG) subdurally implanted over the left hemisphere (33). Data from the  
300 same animals, overlapping partly with the data used here, have been used in several previous studies  
301 (7, 16, 17, 34-41). Recordings were sampled at approximately 32 kHz with a passband of 0.159 – 8000  
302 Hz using a Neuralynx Digital Lynx system. The raw recordings were low-pass filtered at 250 Hz, and  
303 downsampled to 1 kHz. The electrodes were distributed over eight 32-channel headstages and  
304 referenced against a silver wire implanted onto the dura overlying the opposite hemisphere. The  
305 electrodes were re-referenced via a bipolar scheme to achieve 1) greater signal localization 2)

306 cancellation of the common reference, 3) rejection of headstage specific noise. The bipolar derivation  
307 scheme subtracted the recordings from neighboring electrodes (spaced 2.5 mm) that shared a  
308 headstage, resulting in 218 bipolar derivations, referred to as “sites” (see (16) for a detailed description  
309 of the re-referencing procedure).

310 All signal processing was conducted in MATLAB (MathWorks, USA) and made use of the FieldTrip  
311 toolbox (<http://www.fieldtriptoolbox.org/>) (42). Raw data were cleaned of line noise via the subtraction  
312 of 50, 100, and 150 Hz components fit to the data using a discrete Fourier transform. Trial epochs for  
313 each site were de-meant by subtracting the mean over all time points in the epoch. Sites with  
314 excessive noise or lack of signal were excluded, leaving 207 of 218 sites for monkey K, and 203 of 218  
315 for monkey P. Epochs with any site having a variance of greater than 5 times the variance based on all  
316 data from that same site in the same session were rejected. In addition, epochs were manually inspected  
317 and epochs with artifacts were rejected. Subsequently, all epochs were normalized such that the  
318 concatenation of all epochs for a given site had a standard deviation of 1. Following this, all epochs of  
319 each site were combined across sessions.

320 **Region of interest definition.** Fourteen brain areas, shown in Figure 1B, were selected for analysis.  
321 Brain area definitions were defined as follows: 1) Each monkey’s electrode locations were aligned with  
322 its respective anatomical MRI, based on sulcal locations from high resolution intraoperative  
323 photographs. The MRI and electrode locations were then warped to the F99 template brain in CARET  
324 (43), such that each electrode location could be compared with anatomical atlases provided by the  
325 CARET software. Based on these atlases, bipolar derivations with both electrodes within the same area  
326 were assigned to that area (see (16) for a more detailed description).

327 Spatial maps have been restricted to show the average activity across monkeys only at those locations,  
328 where both monkeys had ECoG grid coverage after co-registration. Spatial maps are shown on the  
329 INIA19 macaque brain (44) after co-registration of this template and each monkey’s site locations to the  
330 F99 template brain in CARET (43).

331 **Segmentation of data into analysis periods.** All analyses were computed on correctly performed  
332 trials, i.e. where a response was logged within the allotted time interval after the target change.

333 To identify the most prominent frequency bands, we used phase locking analysis employing the pairwise  
334 phase consistency (PPC) metric (21). For this analysis, the data from 300 ms after cue onset until a  
335 target or distracter change was segmented into 500 ms epochs with 60% overlap. The first 300 ms after  
336 cue onset were excluded to avoid transients. As target and distracter changes occurred at randomized  
337 times, this resulted in a variable number of epochs per trial. Overlap was employed to implement Welch’s  
338 method (45) for improving spectral estimation and optimized for use with the multitaper method (46, 47).  
339 This procedure resulted in 15518 epochs (monkey K: 6689, monkey P: 8829).

340 After identifying the most prominent frequency bands with PPC analysis, subsequent analyses focused  
341 on time-varying power in those bands. Time-varying power was analyzed for periods beginning 450 ms

342 prior to cue onset and ending when a change occurred in either the target or distracter stimulus. As  
343 target and distracter changes occurred at randomized times, this resulted in periods of variable length.  
344 This resulted in 4722 epochs (monkey K: 2190, monkey P: 2532), with a mean length of 1669 ms and  
345 a standard deviation (SD) of 912 ms (monkey K: 1551 ms, SD = 903 ms, monkey P: 1771 ms, SD = 907  
346 ms). Periods were approximately evenly distributed over the four randomly assigned stimulus  
347 configurations: target contralateral (blue = 1251, yellow = 1171), target ipsilateral (blue = 1164, yellow  
348 = 1136). Monkey K: target contralateral (blue = 595; yellow = 554), target ipsilateral (blue = 536; yellow  
349 = 505); monkey P: target contralateral (blue = 656; yellow = 617), target ipsilateral (blue = 628; yellow  
350 = 631). These periods were subjected to time-frequency analysis based on an epoch length of 500 ms  
351 and a step size of 50 ms.

352 **Spectral analysis of power and phase locking.** Spectral analysis proceeded with transformation of  
353 the 500 ms epochs (as defined above) to the frequency domain via the multitaper method (MTM). We  
354 used 3 tapers, which provided a spectral smoothing of  $\pm 4$  Hz (46, 47). Epochs were zero-padded to 1 s  
355 resulting in a frequency resolution of 1 Hz. The spectral power was derived as the squared magnitude  
356 of the complex Fourier coefficients. The percentage power change from baseline was computed as:

357 
$$(\text{power}(\text{stimulation}) - \text{power}(\text{baseline})) / \text{power}(\text{baseline}) * 100\%.$$

358 The baseline value was computed as the average value over the period from -200 ms to 0 ms before  
359 cue onset, averaged over time points and all trials from all conditions, per site.

360 Phase locking was quantified with the pairwise phase consistency (PPC) metric (21). PPC is not biased  
361 by the number of epochs, whereas the more conventional coherence metric has that bias. Essentially,  
362 the PPC calculation proceeds in two steps. First, the relative phases are calculated for the multiple  
363 epochs of the two signals. The second step is the crucial step: In conventional coherence calculation,  
364 those relative phases are averaged, which leads to the bias by epoch number; in PPC calculation, all  
365 possible pairs of relative phases are formed, the cosines between those relative phases are determined  
366 and those cosine values are averaged.

367 **Identification of spectral peaks.** The PPC spectra between all site pairs were used to identify narrow-  
368 band oscillations. A phase locking metric was selected to assess oscillatory content, because it is not  
369 corrupted by  $1/f$  background noise, and therefore provides a robust estimation of peak heights across  
370 frequency (Fig. 3A,B). Peaks were assessed using Gaussian fits to the PPC spectrum of each site pair  
371 across the ECoG grid, using the findpeaksG.m algorithm by T.C O'Haver. Each peak was assessed for  
372 statistical significance ( $p < 0.05$ ) via comparison to a distribution of the maximum PPC value across  
373 frequencies and site pairs to control for multiple comparisons. One-hundred random permutations of the  
374 trial order across pairs were performed followed by computation of the PPC. This procedure disrupts  
375 the phase relations across trials for each site, giving an estimate of the maximal peak height expected  
376 by chance. The probability of a peak at each frequency was found via computation of the smoothed  
377 peak histogram (Fig. 3A,B, upper panels) at each frequency and identifying the dominant peaks using  
378 the findpeaksG.m algorithm. Frequencies of interest (FOIs) were then defined as the full-width-at-half-  
379 maximum of the estimated center frequency of each peak. This revealed four peaks in each monkey,

380 namely theta (monkey K: 2:4.4:7 Hz [start:center:end], monkey P: 2:4.8:7 Hz), beta (K: 16:18.1:20 Hz,  
381 P: 11:13.9:16 Hz), high-beta (K: 31:33.9:36 Hz, P: 29:31.6:35 Hz), and gamma (K: 73:74.5:76 Hz, P:  
382 60:63.0:66 Hz).

383 **Statistical inference on power-change time courses.** Statistical comparisons of time-resolved power  
384 differences were computed via permutation statistics. This entailed randomly assigning each trial to one  
385 of the four unique stimulus conditions shown in Figure 2E, while maintaining the sample sizes for each  
386 condition. Spectral analysis was then performed as described followed by the computation of each  
387 contrast (Figure 2E). This procedure was repeated 10000 times to produce a randomization distribution  
388 for both contrasts. To control for multiple comparisons, a hybrid method was employed that controls for  
389 the temporal, frequency and spatial dimensions. The multiple comparisons across the temporal and  
390 spatial dimensions, were controlled for by a max-based method (48). The multiple comparisons across  
391 the frequency dimension was controlled for by Bonferroni correction, because this is less affected by  
392 large differences in effect size across the different FOIs. Thus, the two-tailed significance criterion of  
393 0.05, 0.025 per tail, was divided by 4 to account for the 4 FOIs tested. This resulted in the following  
394 procedure: 1) Randomization distributions were computed for each contrast, then averaged over  
395 monkeys, 2) The maximum absolute value of the power difference contrasts was found for each FOI  
396 across time windows and brain areas. 3) A critical value was then selected for each FOI from these  
397 distributions as the 99.38<sup>th</sup> percentile, derived as a 4-fold correction of the two-tailed 0.05 p-value, 4)  
398 The observed power differences between contrasts, averaged across monkeys were then compared to  
399 their respective distributions to assess statistical significance at a level of  $p = 0.05$  two-tailed.

#### 400 **Author contributions:**

401 Conceptualization: C.G.R., C.A.B., and P.F.; Methodology: C.G.R., C.A.B., and P.F.; Software:  
402 C.G.R., J.V., and J.M.S.; Investigation: C.A.B. and P.F.; Formal Analysis: C.G.R., J.V., and J.M.S.;  
403 Writing – Original Draft: C.G.R. and P.F.; Writing – Review & Editing: C.G.R., C.A.B., J.V., J.M.S., and  
404 P.F.; Supervision: P.F.; Funding Acquisition: C.A.B. and P.F.

#### 405 **Acknowledgements**

406 PF acknowledges funding by DFG (SPP 1665, FOR 1847, FR2557/5-1-CORNET, FR2557/6-1-  
407 NeuroTMR), EU (HEALTH-F2-2008-200728-BrainSynch, FP7-604102-HBP, FP7-600730-  
408 Magnetrodes), a European Young Investigator Award, National Institutes of Health (1U54MH091657-  
409 WU-Minn-Consortium-HCP), and the LOEWE program (NeFF). CR acknowledges support by the  
410 Basque Government through the BERC 2018-2021 program and by the Spanish State Research  
411 Agency through BCBL Severo Ochoa excellence accreditation SEV-2015-0490. CAB acknowledges  
412 support by the FLAG-ERA JTC 2015 project CANON (co-funded by NWO). JMS acknowledges funding  
413 by NWO (VIDI-grant, 864.14.011).

## 414 References

- 415 1. Yantis S, et al. (2002) Transient neural activity in human parietal cortex during spatial attention  
416 shifts. *Nat Neurosci* 5(10):995–1002.
- 417 2. Grent-t-Jong T, Woldorff MG (2007) Timing and sequence of brain activity in top-down control  
418 of visual-spatial attention. *PLoS Biol* 5(1):e12.
- 419 3. Müller MM, Teder-Sälejärvi W, Hillyard SA (1998) The time course of cortical facilitation during  
420 cued shifts of spatial attention. *Nat Neurosci* 1(7):631–634.
- 421 4. Fries P (2001) Modulation of Oscillatory Neuronal Synchronization by Selective Visual  
422 Attention. *Science* 291(5508):1560–1563.
- 423 5. Taylor K, Mandon S, Freiwald WA, Kreiter AK (2005) Coherent oscillatory activity in monkey  
424 area v4 predicts successful allocation of attention. *Cereb Cortex* 15(9):1424–1437.
- 425 6. Gregoriou GG, Gotts SJ, Zhou H, Desimone R (2009) High-frequency, long-range coupling  
426 between prefrontal and visual cortex during attention. *Science* 324(5931):1207–1210.
- 427 7. Bosman CA, et al. (2012) Attentional Stimulus Selection through Selective Synchronization  
428 between Monkey Visual Areas. *Neuron* 75(5):875–888.
- 429 8. Grothe I, Neitzel SD, Mandon S, Kreiter AK (2012) Switching neuronal inputs by differential  
430 modulations of gamma-band phase-coherence. *J Neurosci* 32(46):16172–16180.
- 431 9. Siegel M, Donner TH, Oostenveld R, Fries P, Engel AK (2008) Neuronal synchronization along  
432 the dorsal visual pathway reflects the focus of spatial attention. *Neuron* 60(4):709–719.
- 433 10. Womelsdorf T, Fries P, Mitra PP, Desimone R (2006) Gamma-band synchronization in visual  
434 cortex predicts speed of change detection. *Nature* 439(7077):733–736.
- 435 11. Bichot NP, Rossi AF, Desimone R (2005) Parallel and serial neural mechanisms for visual  
436 search in macaque area V4. *Science* 308(5721):529–534.
- 437 12. Buffalo EA, Fries P, Landman R, Buschman TJ, Desimone R (2011) Laminar differences in  
438 gamma and alpha coherence in the ventral stream. *Proc Natl Acad Sci U S A* 108(27):11262–  
439 11267.
- 440 13. Gregoriou GG, Gotts SJ, Desimone R (2012) Cell-type-specific synchronization of neural  
441 activity in FEF with V4 during attention. *Neuron* 73(3):581–594.
- 442 14. Zhou H, Schafer RJ, Desimone R (2016) Pulvinar-Cortex Interactions in Vision and Attention.  
443 *Neuron* 89(1):209–220.
- 444 15. Buschman TJ, Miller EK (2007) Top-down versus bottom-up control of attention in the  
445 prefrontal and posterior parietal cortices. *Science* 315(5820):1860–1862.
- 446 16. Bastos AM, et al. (2015) Visual areas exert feedforward and feedback influences through  
447 distinct frequency channels. *Neuron* 85(2):390–401.
- 448 17. Richter CG, Thompson WH, Bosman CA, Fries P (2017) Top-Down Beta Enhances Bottom-Up  
449 Gamma. *J Neurosci* 37(28):6698–6711.
- 450 18. Spyropoulos G, Bosman CA, Fries P (2018) A theta rhythm in macaque visual cortex and its  
451 attentional modulation. *Proc Natl Acad Sci U S A*:201719433.

- 452 19. Vinck M, Womelsdorf T, Buffalo EA, Desimone R, Fries P (2013) Attentional modulation of cell-  
453 class-specific gamma-band synchronization in awake monkey area v4. *Neuron* 80(4):1077–  
454 1089.
- 455 20. Pesaran B, et al. (2018) Investigating large-scale brain dynamics using field potential  
456 recordings: analysis and interpretation. *Nat Neurosci* 21(7):903–919.
- 457 21. Vinck M, van Wingerden M, Womelsdorf T, Fries P, Pennartz CMA (2010) The pairwise phase  
458 consistency: a bias-free measure of rhythmic neuronal synchronization. *Neuroimage*  
459 51(1):112–122.
- 460 22. Buffalo EA, Fries P, Landman R, Liang H, Desimone R (2010) A backward progression of  
461 attentional effects in the ventral stream. *Proc Natl Acad Sci U S A* 107(1):361–365.
- 462 23. Engel AK, Fries P (2010) Beta-band oscillations-signalling the status quo? *Curr Opin*  
463 *Neurobiol.* doi:10.1016/j.conb.2010.02.015.
- 464 24. Landau AN, Fries P (2012) Attention Samples Stimuli Rhythmically. *Curr Biol* 22(11):1000–  
465 1004.
- 466 25. Rollenhagen JE, Olson CR (2005) Low-Frequency Oscillations Arising From Competitive  
467 Interactions Between Visual Stimuli in Macaque Inferotemporal Cortex. *J Neurophysiol*  
468 94(5):3368–3387.
- 469 26. Ghose GM, Ts'o DY (2017) Integration of color, orientation, and size functional domains in the  
470 ventral pathway. *Neurophotonics* 4(3):031216.
- 471 27. Kotake Y, Morimoto H, Okazaki Y, Fujita I, Tamura H (2009) Organization of color-selective  
472 neurons in macaque visual area V4. *J Neurophysiol* 102(1):15–27.
- 473 28. Logothetis NK, Pauls J, Augath M, Trinath T, Oeltermann A (2001) Neurophysiological  
474 investigation of the basis of the fMRI signal. *Nature* 412(6843):150–157.
- 475 29. Niessing J, et al. (2005) Hemodynamic signals correlate tightly with synchronized gamma  
476 oscillations. *Science* 309(5736):948–951.
- 477 30. Scheeringa R, et al. (2011) Neuronal dynamics underlying high- and low-frequency EEG  
478 oscillations contribute independently to the human BOLD signal. *Neuron* 69(3):572–583.
- 479 31. Scheeringa R, Fries P (2019) Cortical layers, rhythms and BOLD signals. *Neuroimage*  
480 197:689–698.
- 481 32. Pesaran B, Pezaris JS, Sahani M, Mitra PP, Andersen RA (2002) Temporal structure in  
482 neuronal activity during working memory in macaque parietal cortex. *Nat Neurosci* 5(8):805–  
483 811.
- 484 33. Rubehn B, Bosman C, Oostenveld R, Fries P, Stieglitz T (2009) A MEMS-based flexible  
485 multichannel ECoG-electrode array. *J Neural Eng* 6(3):036003.
- 486 34. Pinotsis DA, et al. (2014) Contrast gain control and horizontal interactions in V1: A DCM study.  
487 *Neuroimage* 92:143–155.
- 488 35. Brunet N, Vinck M, Bosman CA, Singer W, Fries P (2014) Gamma or no gamma, that is the  
489 question. *Trends Cogn Sci (Regul Ed)* 18(10):507–509.
- 490 36. Brunet N, et al. (2014) Stimulus repetition modulates gamma-band synchronization in primate  
491 visual cortex. *Proc Natl Acad Sci USA* 111(9):3626–3631.

- 492 37. Brunet N, et al. (2015) Visual Cortical Gamma-Band Activity During Free Viewing of Natural  
493 Images. *Cereb Cortex* 25(4):918–926.
- 494 38. Richter CG, Thompson WH, Bosman CA, Fries P (2015) A jackknife approach to quantifying  
495 single-trial correlation between covariance-based metrics undefined on a single-trial basis.  
496 *Neuroimage* 114:57–70.
- 497 39. Vinck M, et al. (2015) How to detect the Granger-causal flow direction in the presence of  
498 additive noise? *Neuroimage* 108:301–318.
- 499 40. Bastos AM, et al. (2015) A DCM study of spectral asymmetries in feedforward and feedback  
500 connections between visual areas V1 and V4 in the monkey. *Neuroimage* 108:460–475.
- 501 41. Lewis CM, Bosman CA, Womelsdorf T, Fries P (2016) Stimulus-induced visual cortical  
502 networks are recapitulated by spontaneous local and interareal synchronization. *Proc Natl  
503 Acad Sci USA* 113(5):E606–15.
- 504 42. Oostenveld R, Fries P, Maris E, Schoffelen J-M (2011) FieldTrip: Open source software for  
505 advanced analysis of MEG, EEG, and invasive electrophysiological data. *Comput Intell  
506 Neurosci* 2011:156869.
- 507 43. Van Essen DC (2012) Cortical cartography and Caret software. *Neuroimage* 62(2):757–764.
- 508 44. Rohlfing T, et al. (2012) The INIA19 Template and NeuroMaps Atlas for Primate Brain Image  
509 Parcellation and Spatial Normalization. *Front Neuroinform* 6:27.
- 510 45. Welch P (1967) The use of fast Fourier transform for the estimation of power spectra: A  
511 method based on time averaging over short, modified periodograms. *IEEE Trans Audio  
512 Electroacoust* 15(2):70–73.
- 513 46. Thomson DJ (1977) Spectrum Estimation Techniques for Characterization and Development of  
514 WT4 Waveguide-I. *Bell System Technical Journal* 56(9):1769–1815.
- 515 47. Percival DB, Walden AT (1993) *Spectral Analysis for Physical Applications* (Cambridge  
516 University Press).
- 517 48. Nichols TE, Holmes AP (2002) Nonparametric permutation tests for functional neuroimaging: a  
518 primer with examples. *Hum Brain Mapp* 15(1):1–25.
- 519

## 520 Legends

521 **Fig. 1.** Behavioral task and regions of interest. (A) Schematic of a correct trial with attention directed to  
522 the blue stimulus in the hemifield ipsilateral to the recording grid. Trials commenced with the monkey  
523 touching a bar. This triggered the presentation of a fixation point. Monkeys were required to maintain  
524 their gaze within a prescribed fixation window throughout task performance (monkey K: 0.85 deg radius,  
525 monkey P: 1 deg radius); otherwise the trial terminated and a timeout was given before the next trial  
526 started. Following a fixed interval (intervals shown as a timeline at the bottom), two isoluminant and  
527 isoecentric drifting sinusoidal gratings appeared, one in each hemifield (diameter: 3 deg, spatial  
528 frequency:  $\approx 1$  cycle/deg, drift velocity:  $\approx 1$  deg/s, resulting temporal frequency:  $\approx 1$  cycle/s, contrast:  
529 100%). Blue and yellow tints were randomly assigned to each of the gratings on each trial. Following a  
530 variable duration (indicated by horizontal red line), the fixation point changed color to match one of the  
531 stimuli, indicating the stimulus to be covertly attended, which we refer to as the target. The un-cued,  
532 behaviorally irrelevant stimulus is referred to as the distracter. Either one of the two stimuli could undergo  
533 a transient change (bending of grating stripes as illustrated), lasting 150 ms. This change could occur  
534 within the longer time period indicated by the horizontal green line. For each trial, two time points were  
535 drawn from a slowly increasing Hazard rate, and randomly assigned to the target and distracter change.  
536 As a consequence, the first stimulus change in a trial was equally likely to be a target or a distracter  
537 change, and these changes occurred with identical temporal probabilities. If the distracter change  
538 occurred before the target change, monkeys were required to wait until the target change and report it  
539 with a bar release. Stimulus changes could occur both before and after the cue. Stimulus changes  
540 before the cue were included to capture the time course of the attentional deployment after cue onset.  
541 Once the cue had been given, bar releases in response to changes of the target were rewarded. Before  
542 the cue, bar releases in response to changes of either stimulus were rewarded in a random 50% of the  
543 cases. The response window was 150-500 ms after the start of the respective stimulus change. (B) The  
544 joint coverage over the two monkeys of the selected brain areas. The figure shows the coverage  
545 obtained in both monkeys; regions covered in only one monkey are excluded. Site coverage has been  
546 co-registered to a common macaque template brain.

547 **Fig. 2.** Behavioral analysis and condition contrasts used for the neurophysiological analysis. (A) The  
548 behavioral response pattern before cue presentation showed a bias towards responses to the blue  
549 stimulus (chi-squared test:  $\chi^2(1, N=793) = 88.59$ ,  $p = 0$ ). (B) Following the presentation of the attentional  
550 cue, the monkeys showed no significant difference in response rates to blue or yellow target stimuli  
551 ( $\chi^2(1, N=2296) = 2.31$ ,  $p = 0.13$ ). (C) Reaction times as a function of the latency between cue  
552 presentation and the start of the target change for the yellow (yellow line) and blue (blue line) stimuli.  
553 Reaction times were binned over 200 ms regions, at 50 ms intervals. Colored shaded regions indicate  
554  $\pm 1$  SEM, pooled over the two monkeys. The gray-shaded region indicates a significant difference in  
555 reaction time to blue versus yellow stimuli ( $p < 0.05$ , two-tailed non-parametric randomization test,  
556 corrected for multiple comparisons across time windows). (D) Schematic diagram of the monkeys'



557 inferred attentional location as a function of time around cue onset. Cue onset signals that the monkey  
558 must change the favored behavioral response (switch) or maintain the current bias (stay). (E) Each gray  
559 square illustrates one of the four possible combinations of stimulus and fixation point coloring. Data from  
560 these task conditions were combined as illustrated by the mathematical formula made up of the  
561 individual conditions. This resulted in two contrasts, the **attention contrast** and the **shift contrast**, as  
562 explained in detail in the results section. Each contrast was multiplied by a factor of 1/2 to preserve the  
563 original magnitudes of the measurements.

564 **Fig. 3.** Determination of individual spectral peaks per monkey. (B) Each dot corresponds to a peak found  
565 in the spectrum of phase locking (PPC) between a given site pair of monkey K. Each spectrum could  
566 contain multiple peaks. There were 21115 site pairs in this monkey. (A) probability mass of detecting  
567 PPC peaks as a function of frequency in monkey K. Black vertical lines and the corresponding  
568 frequencies noted at the top indicate estimated peaks of the probability distribution. Colored regions and  
569 the corresponding frequencies noted at the top denote the full-width-at-half-maximum for each detected  
570 peak. The peaks and the full-width-at-half-maximum defined the frequency bands of interest (FOIs).  
571 (C,D) Same conventions as (A,B), for monkey P (20503 site pairs). Both monkeys showed distinct  
572 regions of theta (green), beta (yellow), high-beta (blue), and gamma (red) frequency oscillatory activity.

573 **Fig. 4.** Attention and shift contrasts in time and space: theta. (A) Topography of the **attention contrast**  
574 for theta-band power, for 200 ms windows centered on the indicated times, averaging both monkeys on  
575 a common macaque template (un-thresholded). Brain area delineations are marked by dashed lines.  
576 (B) Percentage power change from baseline (200 ms window prior to cue onset) for attentional  
577 deployment to the contralateral (red line) and ipsilateral (green line) stimulus, averaged over all sites  
578 within each of the indicated brain areas and then over monkeys. For each brain area, the gray dotted  
579 line indicates zero change relative to baseline. For all brain areas jointly, the scale indicates the  
580 magnitude of the power as a percentage change from baseline. Significant differences between  
581 conditions are denoted by gray shading ( $p < 0.05$ , two-tailed non-parametric randomization test,  
582 corrected for multiple comparisons across time windows and brain areas, and Bonferroni corrected for  
583 the four frequency bins). (C) Same as B, but showing percentage change from baseline for trials in  
584 which attention was shifted (yellow line) or maintained (blue line). (D) Same as A, but for the **shift**  
585 **contrast**.

586 **Fig. 5.** Attention and shift contrasts in time and space: beta. Same conventions as Fig. 4.

587 **Fig. 6.** Attention and shift contrasts in time and space: high-beta. Same conventions as Fig. 4,5.

588 **Fig. 7.** Attention and shift contrasts in time and space: gamma. Same conventions as Fig. 4,5,6.

589 **Fig. 8.** Shift effects occur earlier than deployment effects. The rectified power difference averaged over  
590 frequency bands, brain areas and monkeys shown for the **shift contrast** (green), and the **attention**

591 **contrast** (yellow). Green and yellow horizontal bars on the bottom denote the period that the rectified  
592 difference is statistically significant for the shift and attention contrasts, respectively ( $p < 0.05$ , two-tailed  
593 non-parametric randomization test, corrected for multiple comparisons across time windows). Colored  
594 shaded regions indicate  $\pm 1$  SEM computed across brain areas.

595

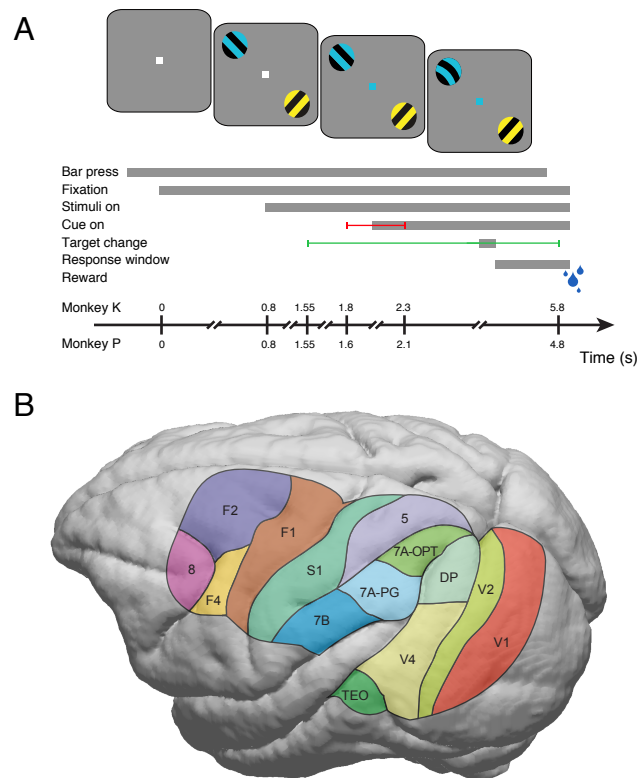

Figure 1

596

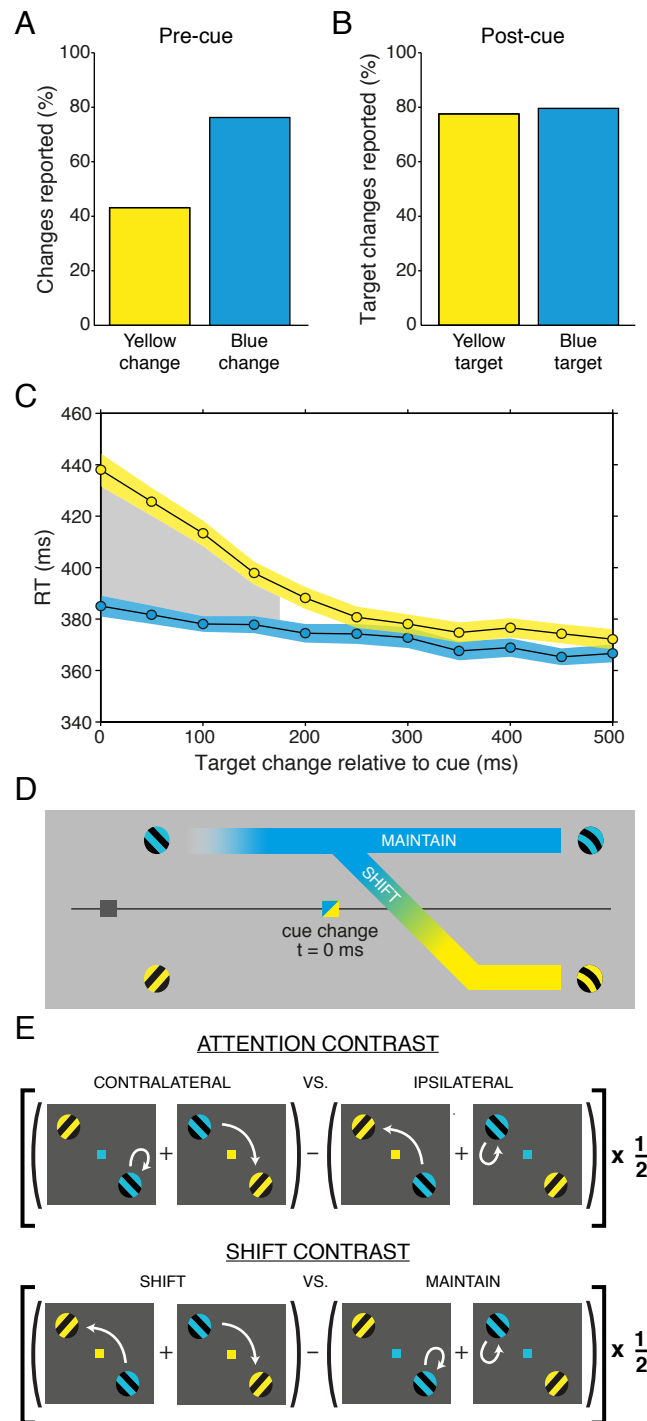

Figure 2

597

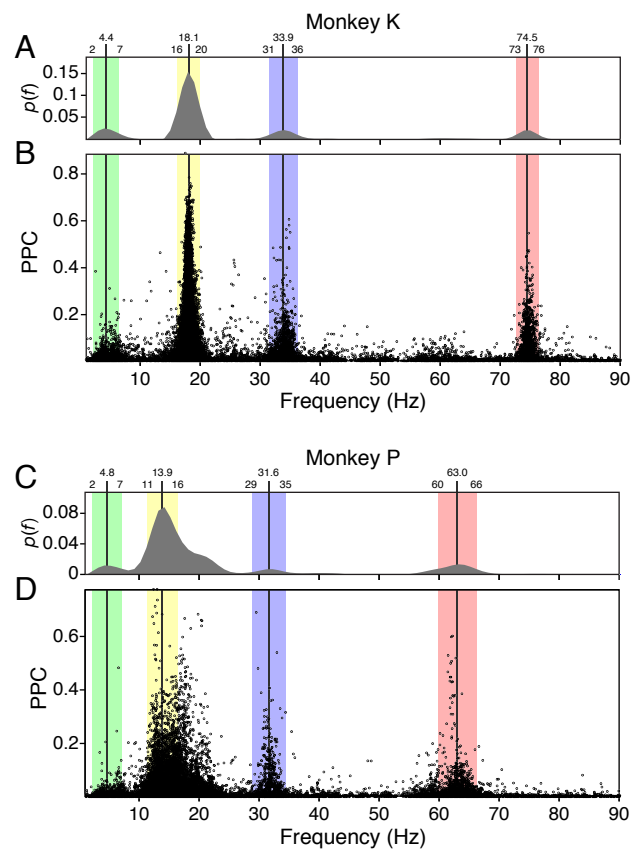

Figure 3

598

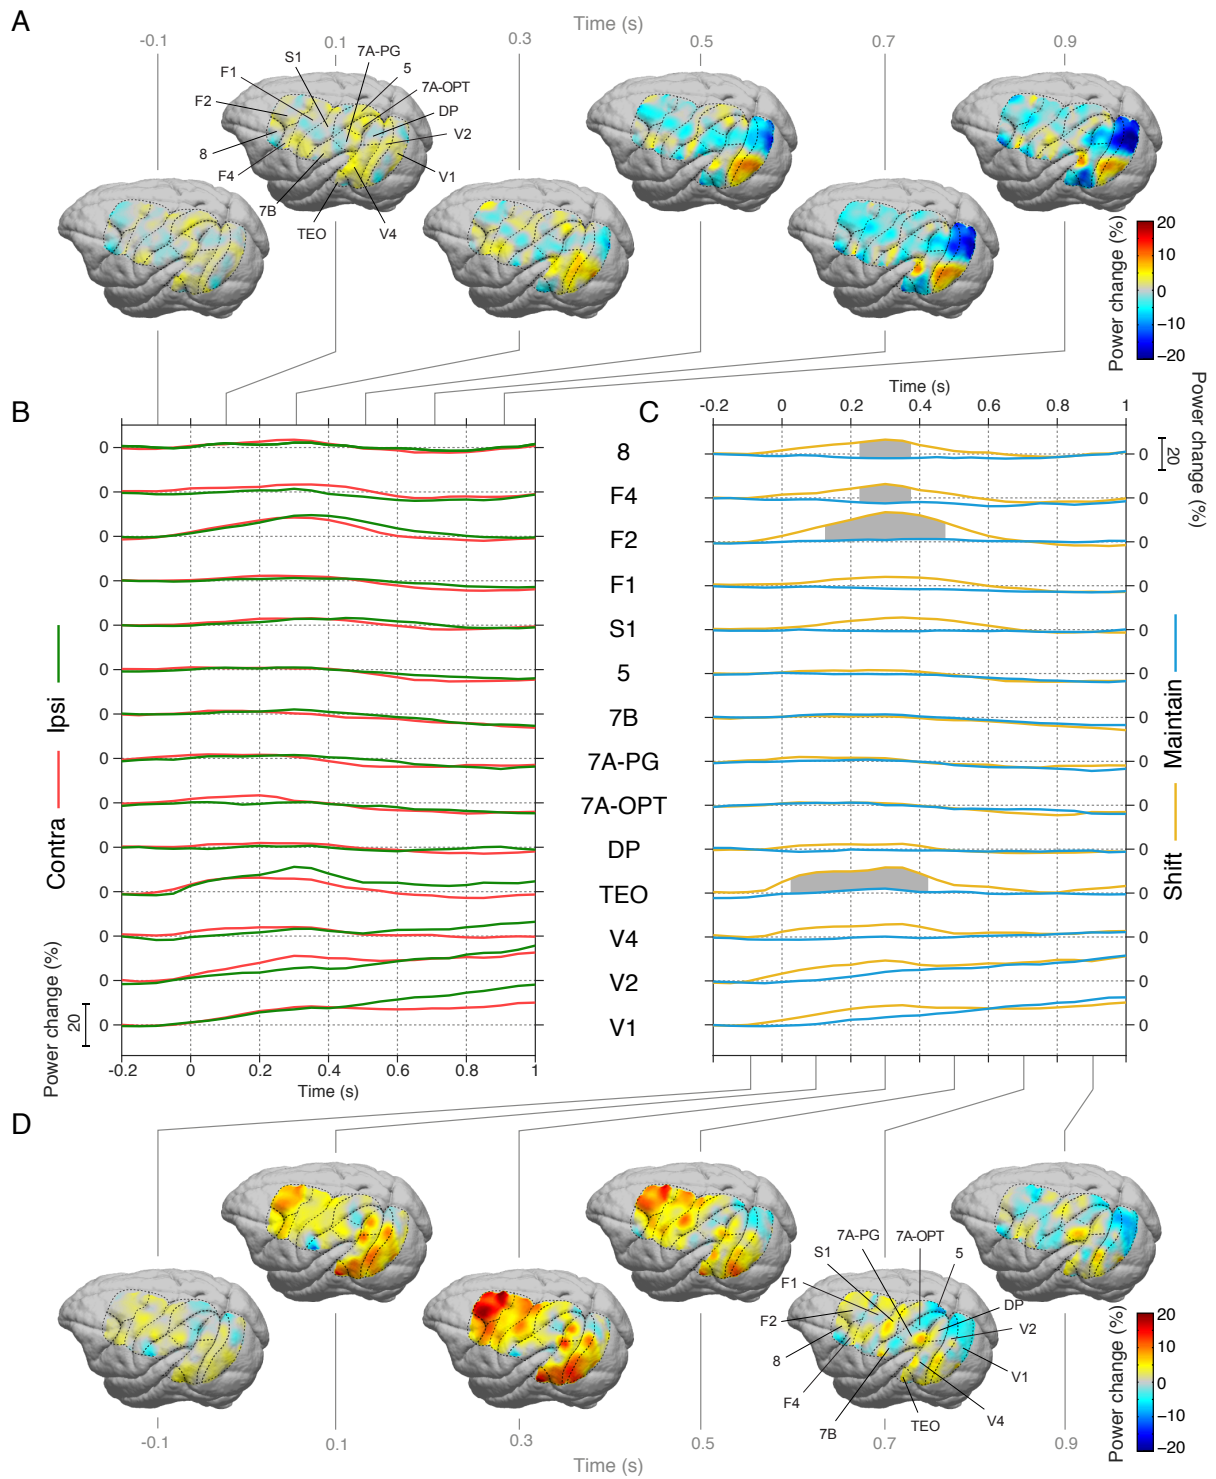

Figure 4: Theta

599

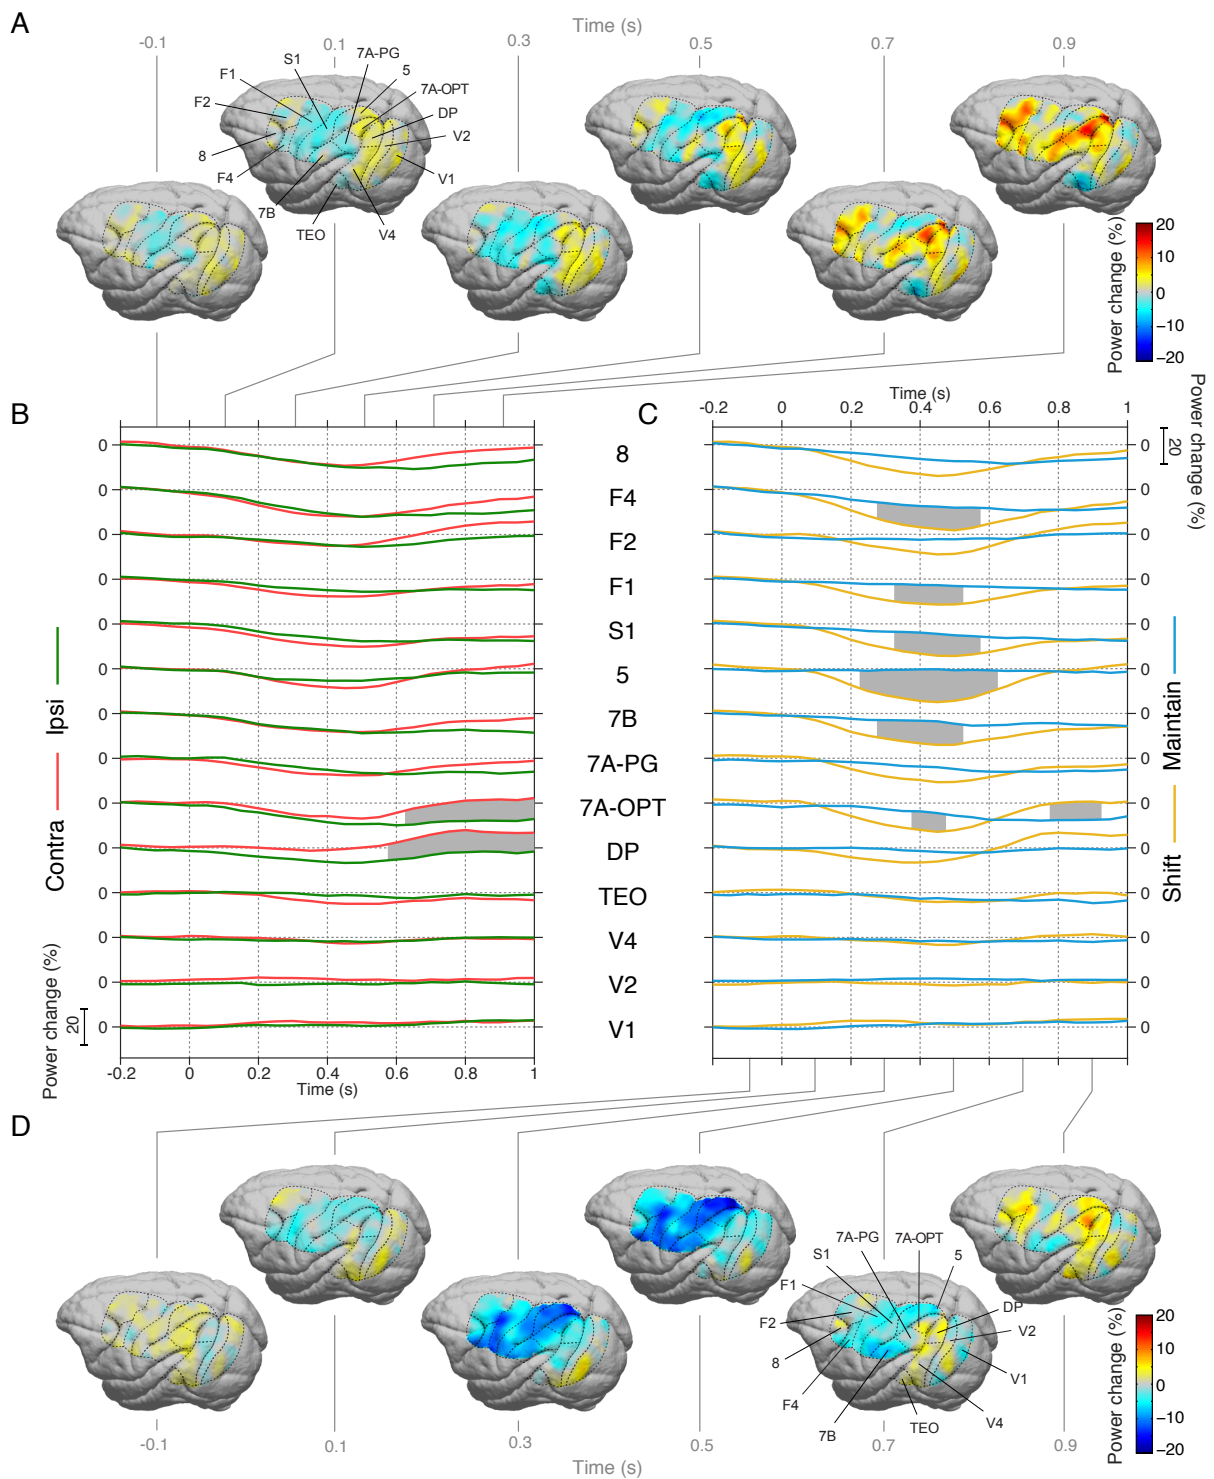

Figure 5: Beta

600

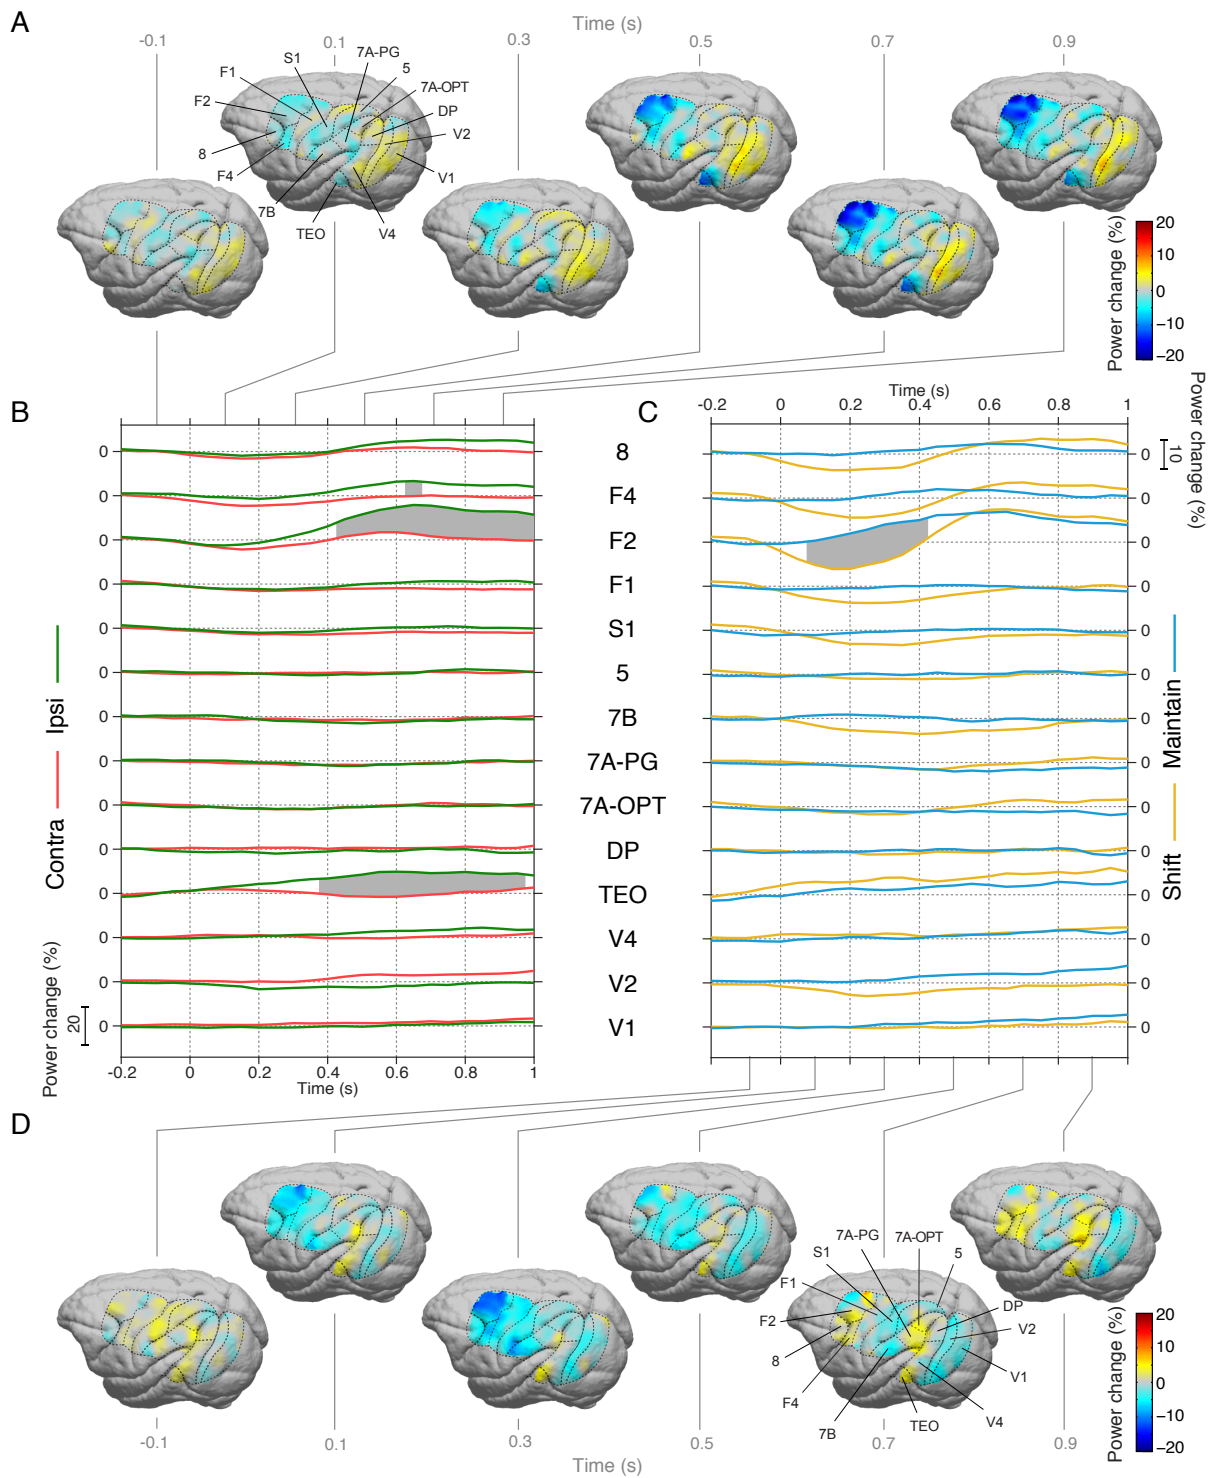

Figure 6: High-beta



601

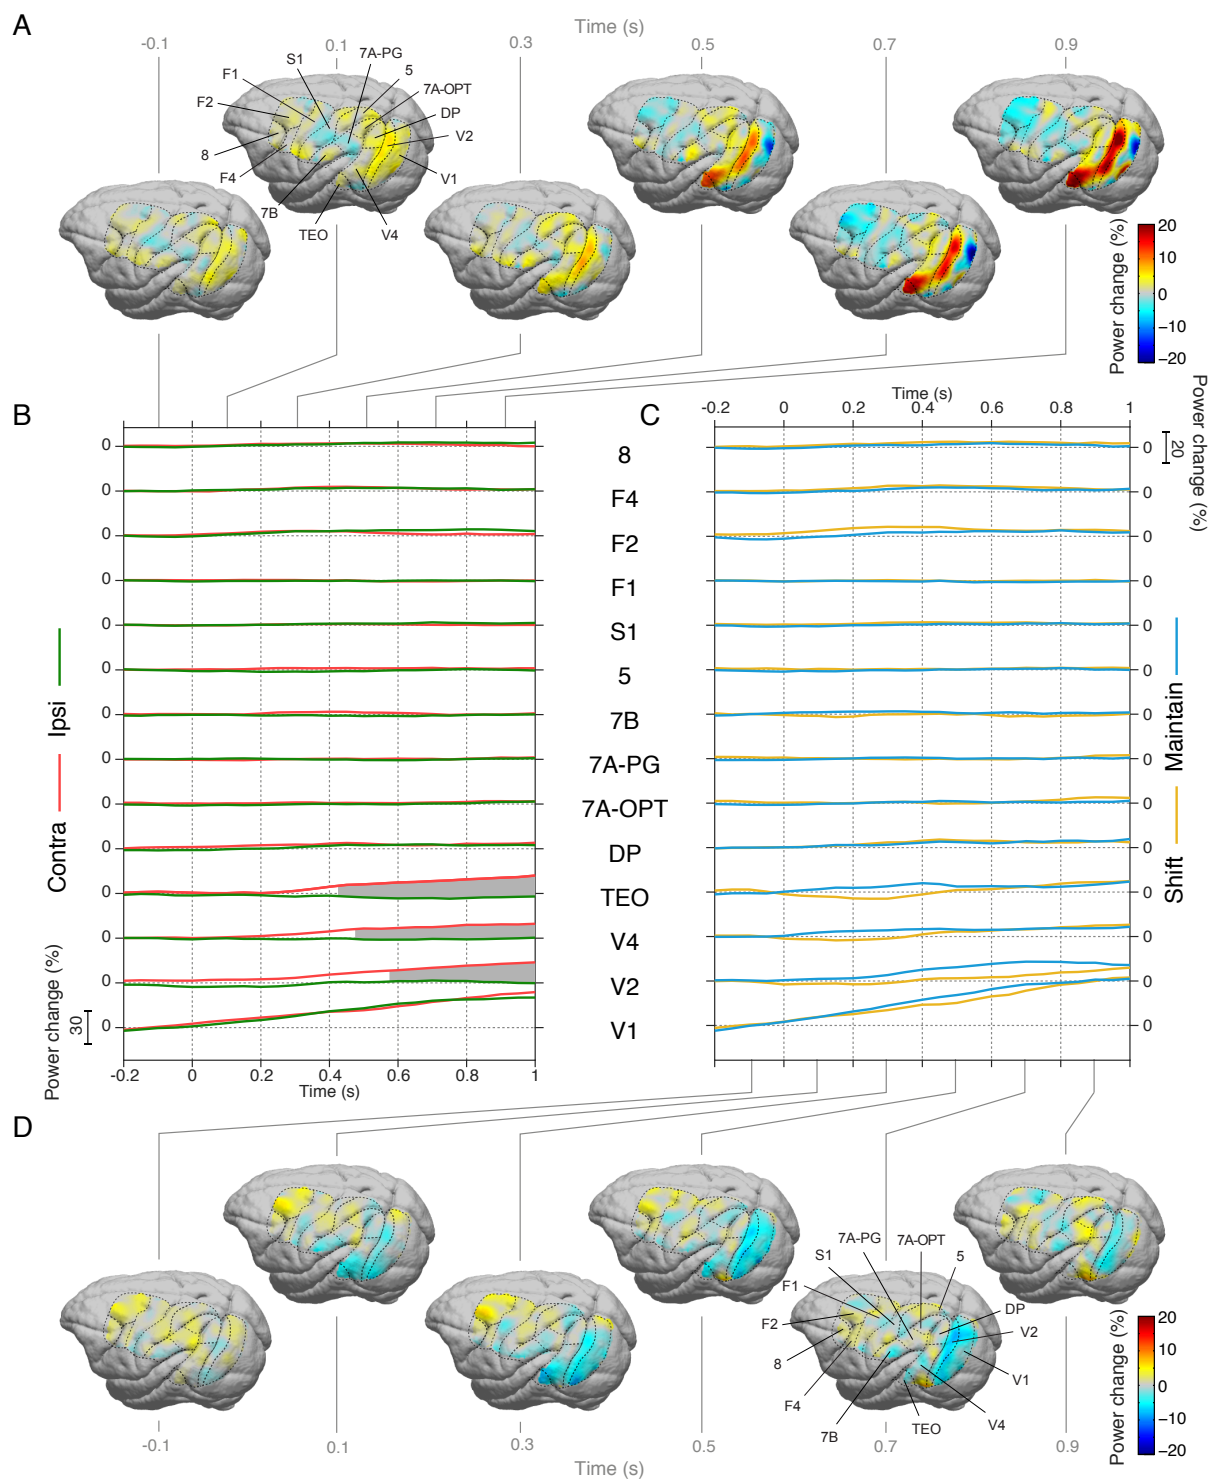

Figure 7: Gamma

602

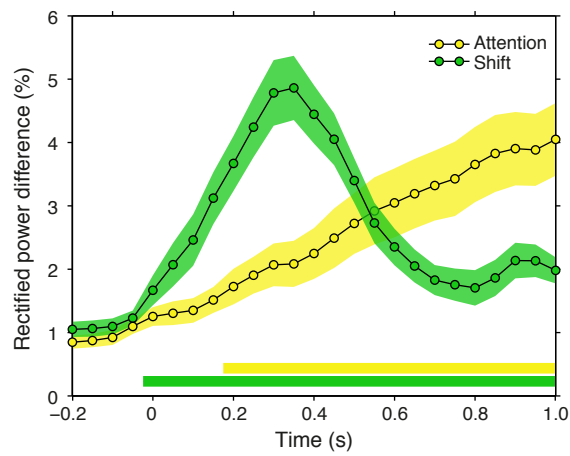

Figure 8
